# Supplementary material for: Development of a Dual Mode UCNPs-MB Biosensor in Combination with PCR for Sensitive Detection of Salmonella
Source: MDPI journal article supplement (doi:10.3390/bios13040475), 2023-04-13
Supplement: s1 [file s1]

# Development of a Dual Mode UCNPs-MB Biosensor in Combination with PCR for Sensitive Detection of *Salmonella*

Lu Han <sup>1</sup>, Min Chen <sup>1</sup>, Yaqi Song <sup>1</sup>, Zhongyu Yan <sup>1</sup>, Dandan Zhou <sup>2</sup>, Leiqing Pan <sup>1</sup> and Kang Tu <sup>1,\*</sup>

- <sup>1</sup> College of Food Science and Technology, Nanjing Agricultural University, Nanjing 210095, China; hanlu@njau.edu.cn (L.H.); 2019208017@njau.edu.cn (M.C.); 2021108037@stu.njau.edu.cn (Y.S.); 2021808103@njau.edu.cn (Z.Y.); pan\_leiqing@njau.edu.cn (L.P.)  
<sup>2</sup> College of Light Industry and Food Engineering, Nanjing Forestry University, Nanjing 210037, China; dandanz@njfu.edu.cn  
\* Correspondence: kangtu@njau.edu.cn; Tel.: +86-25-8439-9016

**Table S1.** The primer sequence for PCR amplification [1].

| Primer  | Sequence (5'-3')        | Length (bp) |
|---------|-------------------------|-------------|
| Primer1 | TGTCCTCCGCCCTGTCTACT    | 20          |
| Primer2 | CGCCATCTAGTAACAATACTTCC | 23          |

**Table S2.** The detail composition of a 40  $\mu$ L PCR amplification reaction.

| Composition               | Concentration | Volume ( $\mu$ L) |
|---------------------------|---------------|-------------------|
| 2 $\times$ Taq Master Mix | -             | 20                |
| Primer1                   | 10 $\mu$ M    | 2                 |
| Primer2                   | 10 $\mu$ M    | 2                 |
| Template DNA              | -             | 4                 |
| ddH <sub>2</sub> O        | -             | 12                |

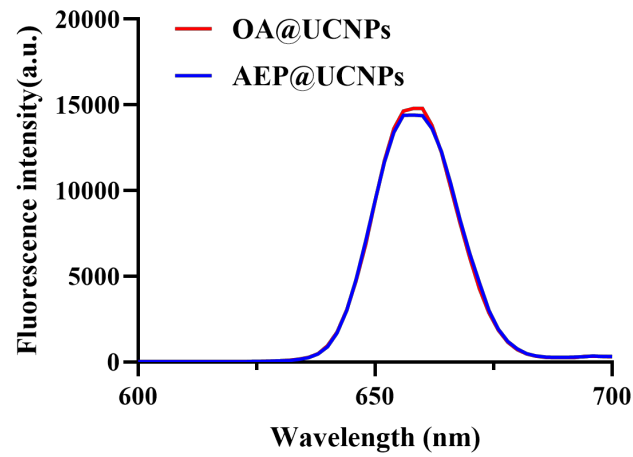

**Figure S1.** Upconversion fluorescence spectra of OA@UCNPs and AEP@UCNPs.

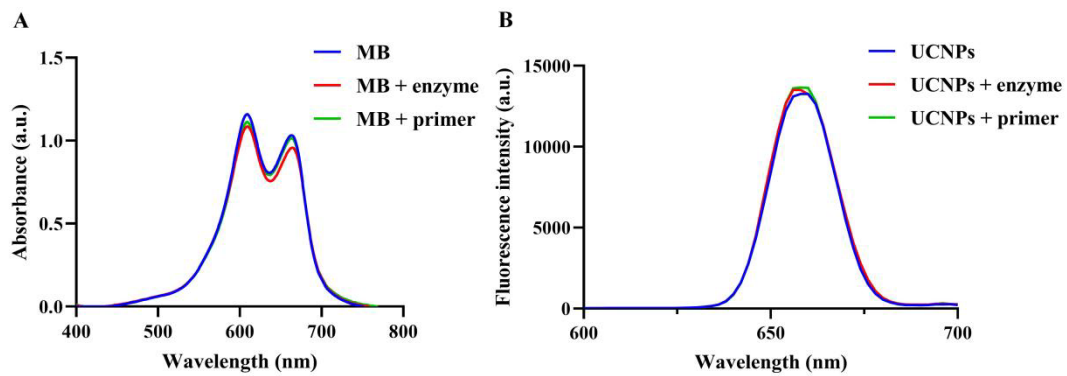

**Figure S2.** (A) UV absorption spectra of MB, MB + enzyme and MB + primer (B) upconversion fluorescence spectra of UCNPs, UCNPs + enzyme, UCNPs + primer.

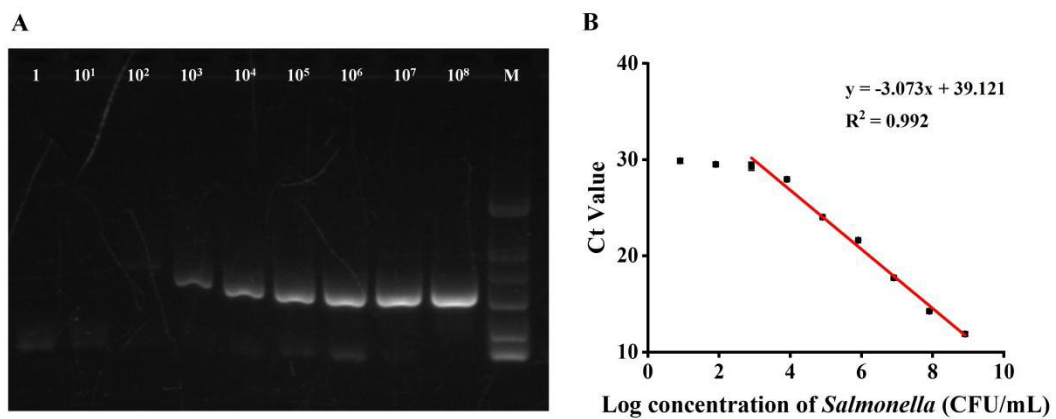

**Figure S3.** The gel electrophoresis of PCR solution (A) and Ct value of qPCR solution (B) with various *Salmonella* concentrations.
